# Supplementary material
Source: PubMed Central journal article supplement (PMC4760177)
Supplement: rspb20152879supp1.pdf [file rspb20152879supp1.pdf]

# Invader or resident? Ancient DNA reveals rapid species turnover in New Zealand little penguins

Stefanie Grosser, Nicolas J. Rawlence, Christian N. K. Anderson, Ian Smith, R. Paul Scofield, Jonathan M. Waters.

## Supplementary material

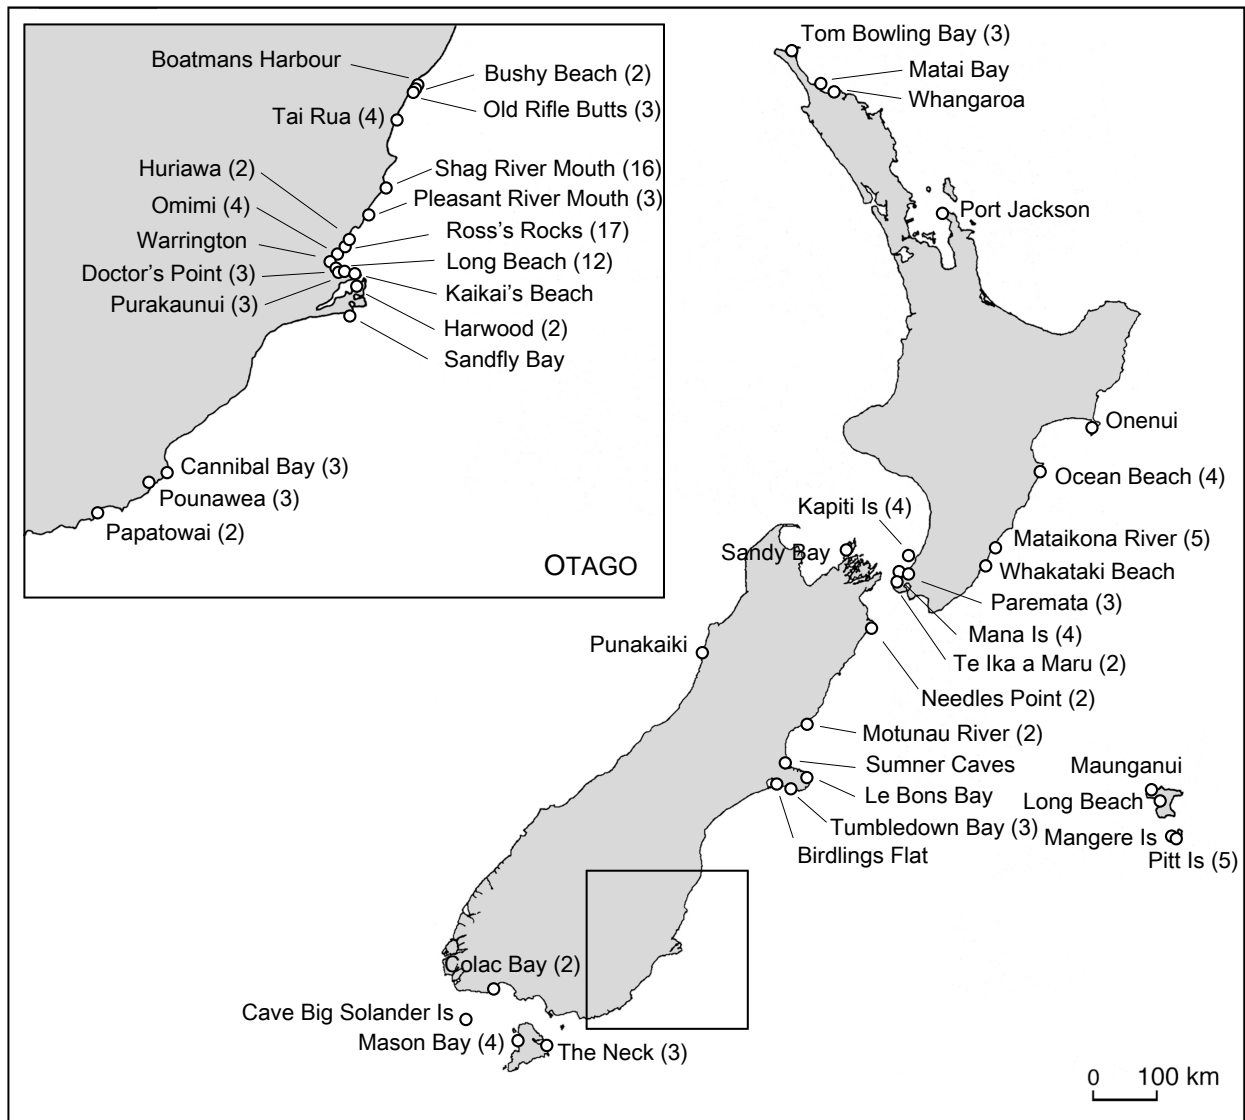

**Figure S1.** Geographic locations of New Zealand Holocene fossil and archaeological sites containing *Eudyptula* remains sampled in this study. Inset shows coastal Otago sites. Number of specimens available from a site is given in parentheses (if more than one).

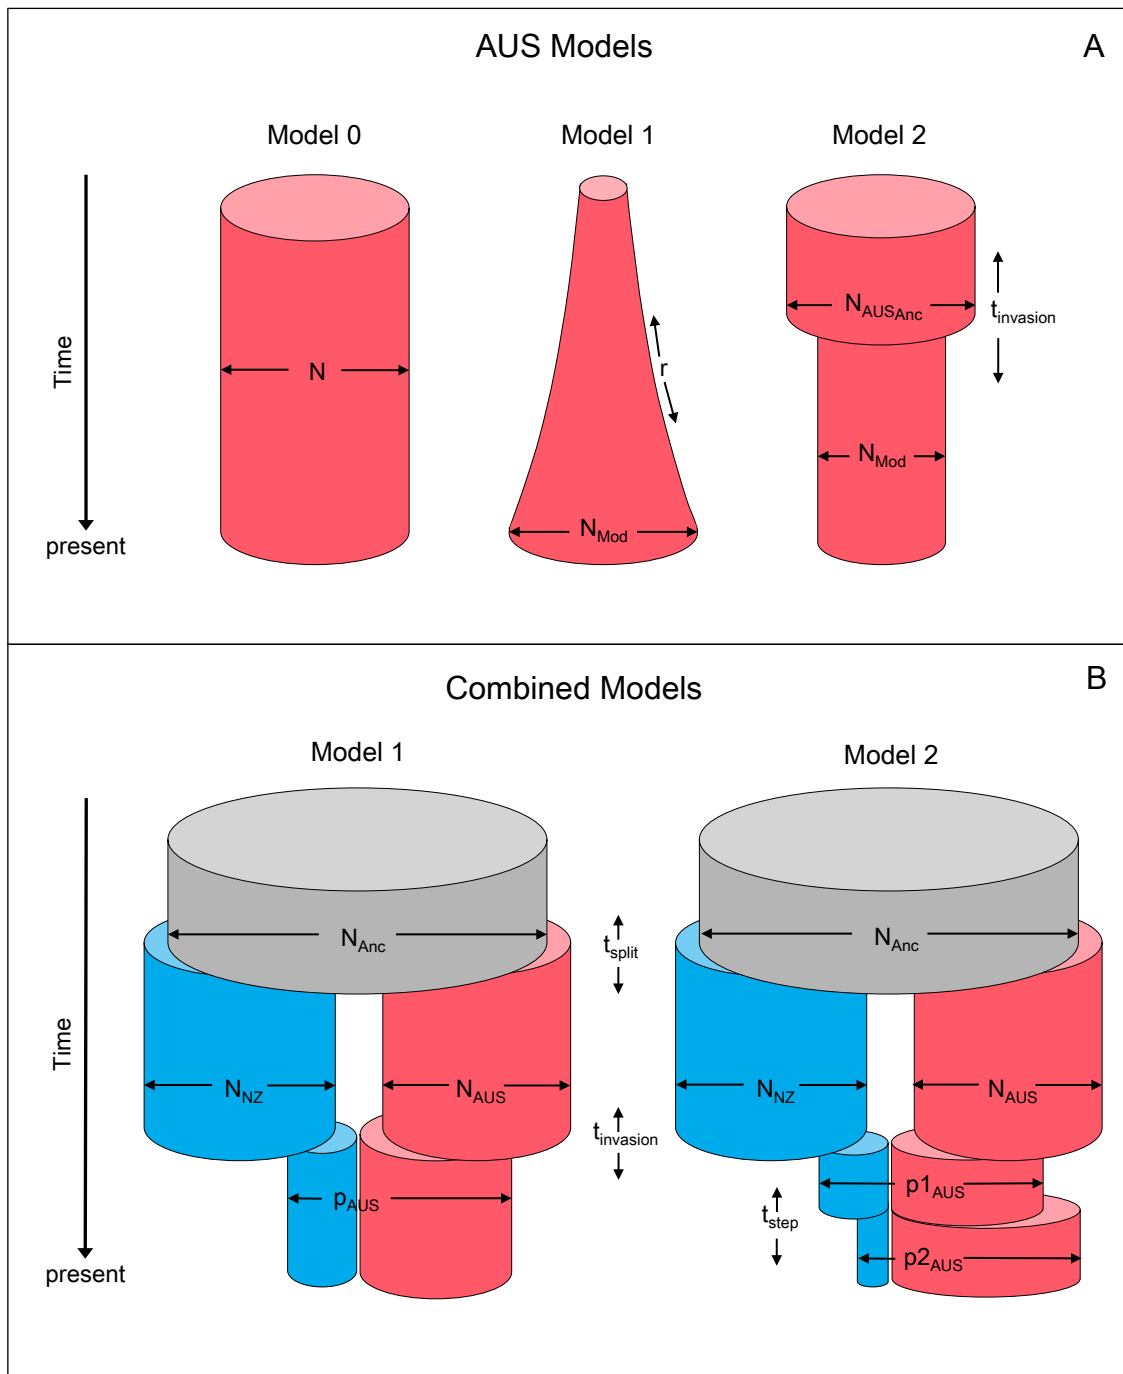

**Figure S2.** Demographic models for the *E. minor* (NZ, blue) and *E. novaehollandiae* (AUS, red) population in Otago analysed using a Bayesian serial coalescent approach. Cylinders represent demes, or panmictic populations of constant size; grey represents an undifferentiated ancestral population. Arrows indicate free parameters approximated with Approximate Bayesian Computation: Anc – ancestral population,  $N_{AUSAnc}$  – ancestral Australian population, Mod – modern population,  $N$  – effective population size,  $r$  – population growth rate,  $p_{AUS}$  – proportion of *E. novaehollandiae* in the total population,  $t_{invasion}$  – time of *E. novaehollandiae* invasion in Otago,  $t_{split}$

– time of most recent common ancestor of *E. minor* and *E.novaehollandiae*,  $t_{\text{step}}$  – time of change in *E. novaehollandiae* population proportions (in secondary contact with *E. minor*). (A) Separate investigation of demographic history of *E. novaehollandiae* in Otago. AUS Model 0: constant population size; AUS Model 1: exponentially-increasing population since the founding event; AUS Model 2: a population constant since the founding event. (B) Combined Models using data of both species to approximate the time of invasion and rate of expansion of *E. novaehollandiae*. Combined Model 1: a single invasion that has maintained a constant proportion of the population since colonisation; Combined Model 2: an invasion followed by an expansion some time after colonisation.

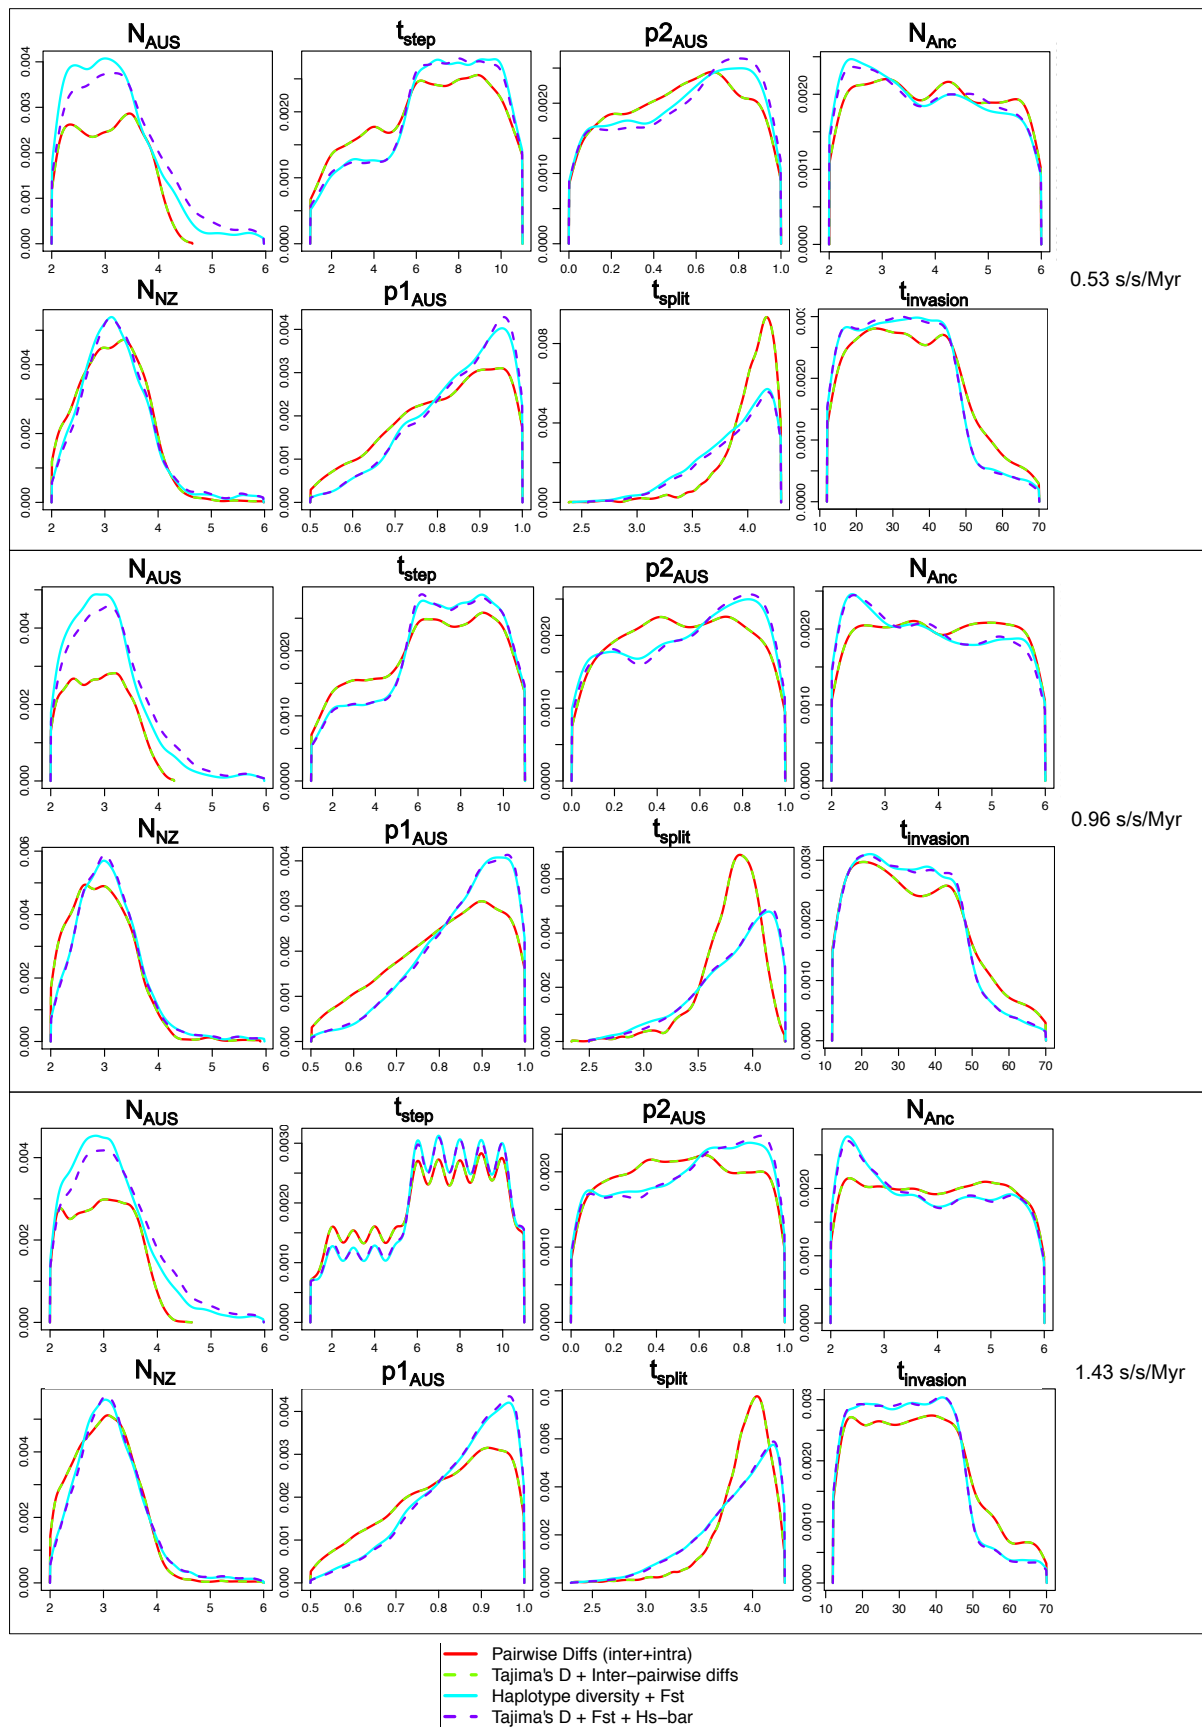

**Figure S3.** Posterior density distributions for Combined model 2 (Lo - 107bp). Models were run at three different mutation rates, given in substitutions/site/million years (s/s/Myr), and using different

summary statistics. Anc – ancestral population, AUS – *E.novaehollandiae*, Hs-bar – mean inter-group diversity, Mod – modern population, N – effective population size, NZ – *E. minor*, Pairwise Diffs – pairwise differences,  $p_{AUS}$  – proportion of *E. novaehollandiae* in the total population,  $t_{invasion}$  – time of *E.novaehollandiae* invasion in Otago,  $t_{split}$  – time of most recent common ancestor of *E. minor* and *E.novaehollandiae*,  $t_{step}$  – time of change in *E. novaehollandiae* population proportions  $N_{AUS}$ ,  $N_{anc}$ ,  $N_{NZ}$  and  $t_{split}$  are log-base 10-transformed.

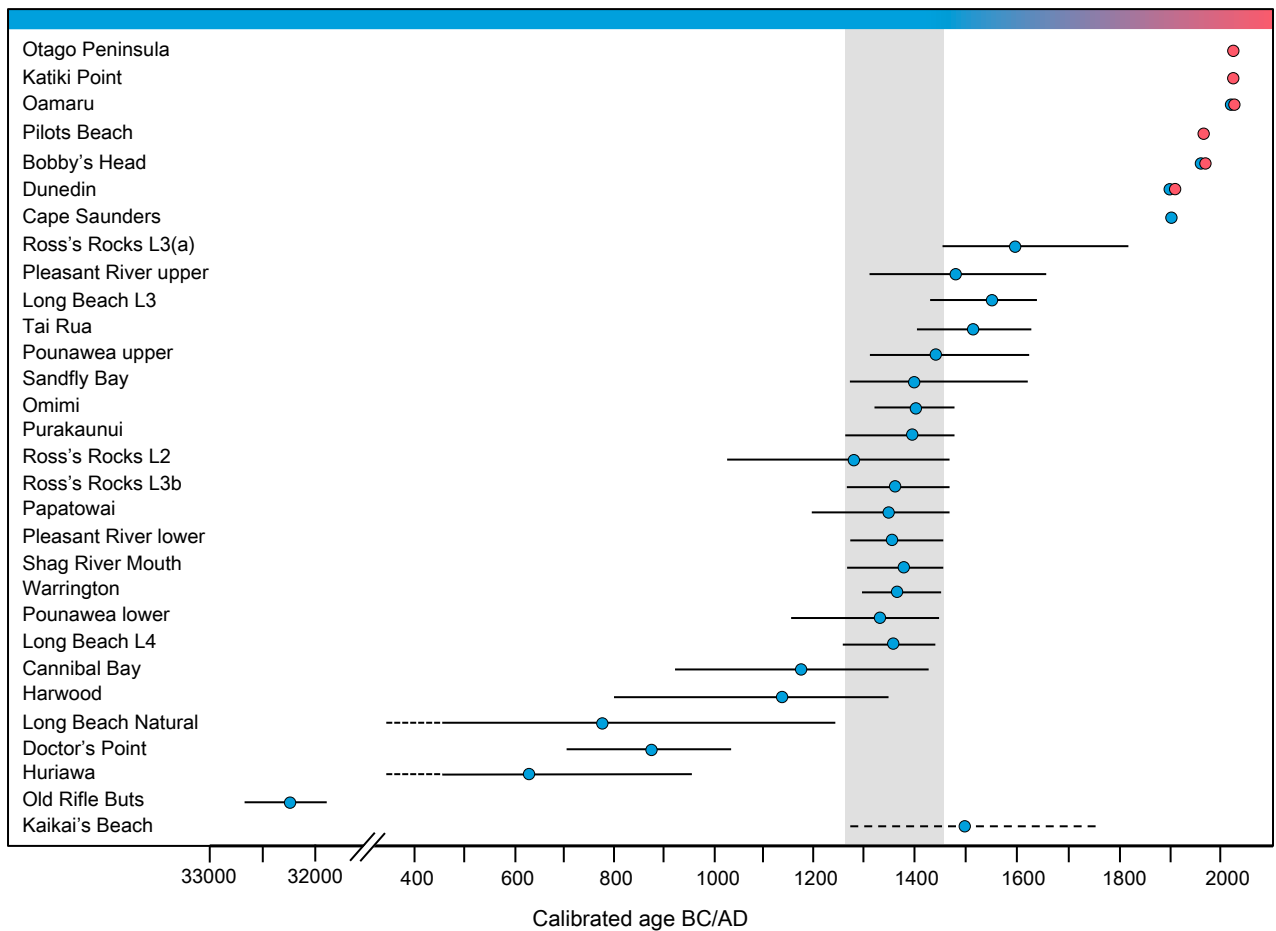

**Figure S4.** Calibrated ages of prehistoric, historic and modern Otago sample sites. Circles represent mean ages (years BC/AD) of sites and blue and red fillings indicated affiliation of samples from the particular site to *E. minor* and *E. novaehollandiae*, respectively. Horizontal bars represent calibrated age range of the particular site. Uncertain/unknown age ranges were drawn in long dashed lines. Age limits outside of the presented time frame are shown in short dashed lines. Human arrival and early settlement period are indicated by a vertical grey bar.

**Table S1.** Pre-human Holocene fossil, archaeological and historic *Eudyptula* specimens used for ancient DNA analysis. Lineage NZ – *E. minor*, AUS – *E. novaehollandiae*. CR3/4 – 107bp fragments, CR3&4 – 107bp contigs, CR3 – 53bp fragment. Mean calibrated ages were calculated for Otago sites only by averaging all calibrated dates from a specific site. Dates are reported as years BC/AD and years BP (standardised to AD 2014). Deposit types are presented for all locations: fossil – before AD 1280; early – AD 1280-1450; middle – AD 1450-1650; historic – AD 1800-1970. Institutional abbreviations AIM: Auckland Institute and Museum, Auckland; CM: Canterbury Museum, Christchurch; JH: Jill Hamel collection, Dunedin; NMNZ: Museum of New Zealand Te Papa Tongarewa, Wellington; BA: Brian Allingham; OM: Otago Museum, Dunedin; OUA: University of Otago, Department of Anthropology and Archaeology, Dunedin. Mean calibrated ages were calculated by averaging across available dates from a site.

| Sample Name | Museum Accession  | Location        | Lineage | Fragment | Element     | Deposit type | Mean cal age (yrs BC/AD) | Mean cal age (yrs BP, 2014 AD) |
|-------------|-------------------|-----------------|---------|----------|-------------|--------------|--------------------------|--------------------------------|
| Eumi_a14    | CM Av21811        | Tom Bowling Bay | NZ      | CR3/4    | femur       | fossil       | -                        | -                              |
| Eumi_a4     | CM Av23513        | Tom Bowling Bay | NZ      | CR3/4    | femur       | fossil       | -                        | -                              |
| Eumi_a78    | CM Av22707        | Tom Bowling Bay | -       | -        | femur       | fossil       | -                        | -                              |
| Eumi_a83    | AIM 6836          | Matai Bay       | NZ      | CR3      | femur       | fossil       | -                        | -                              |
| Eumi_a90    | AIM unregistered  | Whangaroa       | NZ      | CR3&4    | phalanx     | fossil       | -                        | -                              |
| Eumi_a84    | AIM 14001         | Port Jackson    | NZ      | CR3      | femur       | early        | -                        | -                              |
| Eumi_a139   | NMNZ N127/14      | Onenui          | -       | -        | femur       | early        | -                        | -                              |
| Eumi_a82    | NMNZ S.38671.1    | Ocean Beach     | NZ      | CR3&4    | humerus     | fossil/early | -                        | -                              |
| Eumi_a96    | NMNZ S.39124.1    | Ocean Beach     | NZ      | CR3&4    | corocoid    | fossil/early | -                        | -                              |
| Eumi_a97    | NMNZ S.39110.1    | Ocean Beach     | NZ      | CR3&4    | humerus     | fossil/early | -                        | -                              |
| Eumi_a98    | NMNZ S.38617.1    | Ocean Beach     | NZ      | CR3/4    | humerus     | fossil/early | -                        | -                              |
| Eumi_a85    | NMNZ S.42176      | Mataikona River | NZ      | CR3&4    | femur       | fossil       | -                        | -                              |
| Eumi_a93    | NMNZ S.37894.1    | Mataikona River | NZ      | CR3&4    | humerus     | fossil       | -                        | -                              |
| Eumi_a112   | NMNZ S.45445.1    | Mataikona River | -       | -        | humerus     | fossil       | -                        | -                              |
| Eumi_a113   | NMNZ S.41865.1    | Mataikona River | NZ      | CR3&4    | humerus     | fossil       | -                        | -                              |
| Eumi_a114   | NMNZ S.41928.1    | Mataikona River | -       | -        | humerus     | fossil       | -                        | -                              |
| Eumi_a115   | NMNZ S.38442.1    | Whakataki Beach | -       | -        | humerus     | fossil       | -                        | -                              |
| Eumi_a91    | NMNZ unregistered | Centenial Inn   | NZ      | CR3&4    | tibiotarsus | early        | -                        | -                              |

| Sample Name | Museum Accession          | Location                  | Lineage | Fragment | Element     | Deposit type              | Mean cal age (yrs BC/AD) | Mean cal age (yrs BP, 2014 AD) |
|-------------|---------------------------|---------------------------|---------|----------|-------------|---------------------------|--------------------------|--------------------------------|
| Eumi_a105   | NMNZ S.42081.1            | Kapiti Is Cave            | NZ      | CR3      | humerus     | fossil/early              | -                        | -                              |
| Eumi_a106   | NMNZ S.42081.2            | Kapiti Is Cave            | -       | -        | humerus     | fossil/early              | -                        | -                              |
| Eumi_a107   | NMNZ S.42081.3            | Kapiti Is Cave            | NZ      | CR3      | humerus     | fossil/early              | -                        | -                              |
| Eumi_a108   | NMNZ S.42081.4            | Kapiti Is Cave            | -       | -        | humerus     | fossil/early              | -                        | -                              |
| Eumi_a92    | NMNZ N160/50 old area1962 | Paremata                  | NZ      | CR3      | humerus     | early                     | -                        | -                              |
| Eumi_a94    | NMNZ N160/50 old area1962 | Paremata                  | NZ      | CR3&4    | humerus     | early                     | -                        | -                              |
| Eumi_a95    | NMNZ N160/50 1952         | Paremata                  | NZ      | CR3&4    | coracoid    | early                     | -                        | -                              |
| Eumi_a80    | NMNZ R26/141 AB89         | Mana Is                   | NZ      | CR3&4    | humerus     | early, middle or historic | -                        | -                              |
| Eumi_a86    | NMNZ R26/141 AB89         | Mana Is                   | NZ      | CR3      | humerus     | early, middle or historic | -                        | -                              |
| Eumi_a89    | NMNZ R26/141 AB89         | Mana Is                   | NZ      | CR3      | humerus     | early, middle or historic | -                        | -                              |
| Eumi_a110   | NMNZ R26/141 AB89         | Mana Is                   | NZ      | CR3&4    | humerus     | early, middle or historic | -                        | -                              |
| Eumi_a109   | NMNZ 3N/4+5               | Te Ika a Maru Bay         | NZ      | CR3&4    | humerus     | undated                   | -                        | -                              |
| Eumi_a111   | NMNZ 3N/5 27/9 26/13      | Te Ika a Maru Bay         | NZ      | CR3&4    | humerus     | undated                   | -                        | -                              |
| Eumi_a51    | CM Av29684                | Sandy Bay, D'Urville Is   | NZ      | CR3/4    | femur       | fossil                    | -                        | -                              |
| Eumi_a75    | CM Av32061                | Needles Point, Malborough | NZ      | CR3&4    | femur       | fossil                    | -                        | -                              |
| Eumi_a23    | CM Av26031                | Needles Point, Malborough | NZ      | CR3      | femur       | fossil                    | -                        | -                              |
| Eumi_a116   | CM unregistered           | Wtc Punakaiki             | NZ      | CR3&4    | rib         | fossil                    | -                        | -                              |
| Eumi_a12    | CM Av30045                | Motunau River             | NZ      | CR3/4    | femur       | fossil                    | -                        | -                              |
| Eumi_a19    | CM Av30042                | Motunau River             | NZ      | CR3/4    | femur       | fossil                    | -                        | -                              |
| Eumi_a11    | CM Av27603                | Long Beach (Chatham Is)   | -       | -        | femur       | fossil                    | -                        | -                              |
| Eumi_a21    | CM Av30149                | Maunganui                 | NZ      | CR3/4    | tibiotarsus | fossil                    | -                        | -                              |
| Eumi_a76    | CM Av28348                | Chatham Is                | NZ      | CR3/4    | femur       | fossil                    | -                        | -                              |
| Eumi_a77    | CM Av27869                | Chatham Is                | NZ      | CR3/4    | femur       | fossil                    | -                        | -                              |
| Eumi_a88    | AIM 12069                 | Pitt Is                   | NZ      | CR3      | femur       | fossil/early              | -                        | -                              |
| Eumi_a79    | AIM 12062                 | Pitt Is                   | NZ      | CR3/4    | femur       | fossil/early              | -                        | -                              |
| Eumi_a102   | NMNZ S.45633.1            | Pitt Is                   | -       | -        | humerus     | fossil/early              | -                        | -                              |
| Eumi_a103   | NMNZ S.45366.2            | Pitt Is                   | NZ      | CR3      | humerus     | fossil/early              | -                        | -                              |
| Eumi_a104   | AIM 12071                 | Pitt Is                   | -       | -        | humerus     | fossil/early              | -                        | -                              |
| Eumi_a87    | NMNZ S.36228.1            | Mangere Is                | -       | -        | humerus     | fossil/early              | -                        | -                              |
| Eumi_a24    | CM Av16488                | Birdlings Flat            | NZ      | CR3/4    | femur       | fossil/early              | -                        | -                              |
| Eumi_a22    | CM Av22394                | Sumner Caves              | NZ      | CR3/4    | femur       | fossil/early              | -                        | -                              |
| Eumi_a13    | CM Av14610                | Le Bons Bay               | NZ      | CR3/4    | femur       | early                     | -                        | -                              |
| Eumi_a17    | CM Av9832                 | Tumbledown Bay            | NZ      | CR3&4    | femur       | early                     | -                        | -                              |
| Eumi_a123   | BA TBS94/30B3Nth          | TumbledownBay             | NZ      | CR3&4    | humerus     | early                     | -                        | -                              |
| Eumi_a124   | BA TBS94/30BNWend         | TumbledownBay             | NZ      | CR3&4    | humerus     | early                     | -                        | -                              |

| Sample Name | Museum Accession            | Location                      | Lineage | Fragment | Element         | Deposit type | Mean cal age (yrs BC/AD) | Mean cal age (yrs BP, 2014 AD) |
|-------------|-----------------------------|-------------------------------|---------|----------|-----------------|--------------|--------------------------|--------------------------------|
| Eumi_a2     | CM Av24902                  | Old Rifle Butts,Cape Wanbrow  | NZ      | CR3      | femur           | fossil       | -                        | -                              |
| Eumi_a3     | CM Av21256A                 | Boatsmans Harbour             | -       | -        | femur           | fossil       | -                        | -                              |
| Eumi_a6     | CM Av24930                  | Old Rifle Butts,Cape Wanbrow  | NZ      | CR3/4    | tibiotarsus     | fossil       | 32308 (BC)               | 34321                          |
| Eumi_a8     | CM Av24920                  | Old Rifle Butts, Cape Wanbrow | NZ      | CR3/4    | tibiotarsus     | fossil       | 32308 (BC)               | 34321                          |
| Eumi_a9     | CM Av29869                  | Bushy Beach, Cape Wanbrow     | -       | -        | femur           | fossil       | -                        | -                              |
| Eumi_a53    | CM Av29692                  | Bushy Beach, Cape Wanbrow     | -       | -        | femur           | fossil       | -                        | -                              |
| Eumi_a72    | OUA 48/53 at 53/68, L. top5 | Tai Rua                       | NZ      | CR3/4    | tibia           | early/middle | 1514                     | 502                            |
| Eumi_a73    | OUA 64/68, L.5              | Tai Rua                       | NZ      | CR3/4    | tibia           | early/middle | 1514                     | 502                            |
| Eumi_a140   | OUA T.R. C/I/3-4            | Tai Rua                       | NZ      | CR3      | coracoid        | early/middle | 1514                     | 502                            |
| Eumi_a141   | OUA T.R. 48/53 at 83/58 15a | Tai Rua                       | NZ      | CR3&4    | femur           | early/middle | 1514                     | 502                            |
| Eumi_a33    | OUA SMC-L1-01               | Shag River Mouth              | NZ      | CR3/4    | femur           | early        | 1383                     | 632                            |
| Eumi_a34    | OUA SMC-L2-02               | Shag River Mouth              | NZ      | CR3/4    | tibiotarsus     | early        | 1383                     | 632                            |
| Eumi_a35    | OUA SMC-L2-03               | Shag River Mouth              | -       | -        | tibiotarsus     | early        | -                        | -                              |
| Eumi_a36    | OUA SMC-L2-04               | Shag River Mouth              | -       | -        | tibiotarsus     | early        | -                        | -                              |
| Eumi_a37    | OUA SMC-L6-05               | Shag River Mouth              | -       | -        | humerus         | early        | -                        | -                              |
| Eumi_a38    | OUA SMC-L6-06               | Shag River Mouth              | -       | -        | humerus         | early        | -                        | -                              |
| Eumi_a39    | OUA SMC-L6-07               | Shag River Mouth              | NZ      | CR3&4    | humerus         | early        | 1383                     | 632                            |
| Eumi_a40    | OUA SMC-L6-08               | Shag River Mouth              | NZ      | CR3/4    | humerus         | early        | 1383                     | 632                            |
| Eumi_a41    | OUA SMC-L7-09               | Shag River Mouth              | NZ      | CR3/4    | tibiotarsus     | early        | 1383                     | 632                            |
| Eumi_a42    | OUA SMC-L7-10               | Shag River Mouth              | NZ      | CR3&4    | tibiotarsus     | early        | 1383                     | 632                            |
| Eumi_a43    | OUA SMC-L7-11               | Shag River Mouth              | NZ      | CR3/4    | tibiotarsus     | early        | 1383                     | 632                            |
| Eumi_a44    | OUA SMC-L9-12               | Shag River Mouth              | NZ      | CR3/4    | radius          | early        | 1383                     | 632                            |
| Eumi_a45    | OUA SMC-L9-13               | Shag River Mouth              | NZ      | CR3/4    | ulna            | early        | 1383                     | 632                            |
| Eumi_a46    | OUA SMC-L10-14              | Shag River Mouth              | NZ      | CR3/4    | ulna            | early        | 1383                     | 632                            |
| Eumi_a47    | OUA SMC-L11-15              | Shag River Mouth              | -       | -        | tibiotarsus     | early        | -                        | -                              |
| Eumi_a48    | OUA SMC-L-16                | Shag River Mouth              | NZ      | CR3&4    | fibula          | early        | 1383                     | 632                            |
| Eumi_a27    | OUA PLRA2/503/BB1 L4        | Pleasant River                | NZ      | CR3/4    | humerus         | early        | 1359                     | 656                            |
| Eumi_a28    | OUA PLR377/14/BB2 L4        | Pleasant River                | NZ      | CR3/4    | humerus         | early        | 1359                     | 656                            |
| Eumi_a29    | OUA PLR201/1                | Pleasant River                | NZ      | CR3/4    | ulna            | middle       | 1509                     | 507                            |
| Eumi_a69    | OUA K13, upper terrace      | Huriawa                       | NZ      | CR3/4    | coracoid        | fossil       | 453                      | 1563                           |
| Eumi_a70    | OUA B/NW, mid terrace       | Huriawa                       | NZ      | CR3/4    | tarsometatarsus | fossil       | 824                      | 1176                           |
| Eumi_a66    | OUA RR/D/2/II L.2 #4        | Ross's Rocks                  | -       | -        | ulna            | fossil/early | -                        | -                              |
| Eumi_a67    | OUA RR/D/1/II L.2 #4        | Ross's Rocks                  | NZ      | CR3/4    | -               | fossil/early | 1282                     | 751                            |
| Eumi_a74    | OUA RR/B/4/III L.2 #4       | Ross's Rocks                  | NZ      | CR3&4    | -               | fossil       | 1161                     | 889                            |
| Eumi_a117   | OUA RR/C/3/II/13            | Ross's Rocks                  | NZ      | CR3/4    | radius          | middle/late  | 1595                     | 421                            |
| Eumi_a128   | OUA RR/C/3/III,L3b#4,1      | Ross's Rocks                  | NZ      | CR3/4    | tibiotarsus     | early        | 1369                     | 645                            |



| Sample Name | Museum Accession              | Location           | Lineage | Fragment | Element     | Deposit type | Mean cal age (yrs BC/AD) | Mean cal age (yrs BP, 2014 AD) |
|-------------|-------------------------------|--------------------|---------|----------|-------------|--------------|--------------------------|--------------------------------|
| Eumi_a129   | OUA RR/C/3/III,L3b#4,2        | Ross's Rocks       | NZ      | CR3/4    | tibiotarsus | early        | 1369                     | 645                            |
| Eumi_a130   | OUA RR/C/1/III,L3a#4          | Ross's Rocks       | NZ      | CR3/4    | tibiotarsus | middle       | 1595                     | 421                            |
| Eumi_a131   | OUA RR/C/3/IV,L3b#4a          | Ross's Rocks       | NZ      | CR3/4    | tibiotarsus | early        | 1369                     | 645                            |
| Eumi_a132   | OUA RR/C/3/IV,L3b#4b          | Ross's Rocks       | NZ      | CR3/4    | tibiotarsus | early        | 1369                     | 645                            |
| Eumi_a133   | OUA RR/A/4/II,L3#4            | Ross's Rocks       | NZ      | CR3/4    | femur       | middle       | 1595                     | 421                            |
| Eumi_a134   | OUA RR/D/2/II,L2#4            | Ross's Rocks       | NZ      | CR3/4    | ulna        | early/middle | 1403                     | 612                            |
| Eumi_a135   | OUA RR/A/1/IV,L3              | Ross's Rocks       | NZ      | CR3/4    | tibiotarsus | middle       | 1595                     | 421                            |
| Eumi_a136   | OUA RR/A/3/IV,L3#4            | Ross's Rocks       | NZ      | CR3/4    | tibiotarsus | middle       | 1595                     | 421                            |
| Eumi_a137   | OUA RR/B/1/III,L3             | Ross's Rocks       | NZ      | CR3/4    | tibiotarsus | middle       | 1595                     | 421                            |
| Eumi_a138   | OUA RR/A/2/I, L3 #4           | Ross's Rocks       | NZ      | CR3/4    | humerus     | middle       | 1595                     | 421                            |
| Eumi_a145   | OUA RR/C/3/II L3b #4          | Ross's Rocks       | NZ      | CR3/4    | femur       | early        | 1369                     | 645                            |
| Eumi_a146   | OUA RR/C/3/II l3b #4          | Ross's Rocks       | NZ      | CR3&4    | femur       | early        | 1369                     | 645                            |
| Eumi_a71    | OUA 39, Bay 3/6, 3c,          | Omimi              | -       | -        | coracoid    | early/middle | -                        | -                              |
| Eumi_a125   | OUA OMSq37-2A                 | Omimi              | NZ      | CR3&4    | tibiotarsus | early/middle | 1402                     | 613                            |
| Eumi_a126   | OUA OMSq8-2C                  | Omimi              | NZ      | CR3/4    | humerus     | early/middle | 1402                     | 613                            |
| Eumi_a127   | OUA OMSq14-3C                 | Omimi              | -       | -        | femur       | early/middle | -                        | -                              |
| Eumi_a68    | OUA Wgnt 5D, L2D2             | Warrington         | NZ      | CR3/4    | humerus     | early        | 1368                     | 647                            |
| Eumi_a142   | BA I44/74 surface colln, 3/N  | Doctors Point      | NZ      | CR3&4    | tibiotarsus | fossil       | 882                      | 1133                           |
| Eumi_a143   | BA I44/74 surface at 91 excun | Doctors Point      | NZ      | CR3&4    | tibiotarsus | fossil       | 882                      | 1133                           |
| Eumi_a144   | BA I44/74 eroded foreshore 91 | Doctors Point      | NZ      | CR3      | tibiotarsus | fossil       | 882                      | 1133                           |
| Eumi_a30    | OUA PK/B/3-L3                 | Purakaunui         | -       | -        | femur       | early/middle | -                        | -                              |
| Eumi_a31    | OUA PK/C/4-L2                 | Purakaunui         | NZ      | CR3&4    | tibiotarsus | early/middle | 1393                     | 622                            |
| Eumi_a32    | OUA PK/C/3-L3                 | Purakaunui         | -       | -        | femur       | early/middle | -                        | -                              |
| Eumi_a5     | CM Av17619                    | Long Beach (Otago) | NZ      | CR3/4    | tibiotarsus | fossil       | 784                      | 1230                           |
| Eumi_a58    | CM Av17619A                   | Long Beach (Otago) | NZ      | CR3/4    | humerus     | fossil       | 784                      | 1230                           |
| Eumi_a57    | CM Av17619B                   | Long Beach (Otago) | NZ      | CR3/4    | humerus     | fossil       | 784                      | 1230                           |
| Eumi_a56    | CM Av17619C                   | Long Beach (Otago) | NZ      | CR3/4    | humerus     | fossil       | 784                      | 1230                           |
| Eumi_a55    | CM Av17619D                   | Long Beach (Otago) | NZ      | CR3/4    | humerus     | fossil       | 784                      | 1230                           |
| Eumi_a54    | CM Av17619E                   | Long Beach (Otago) | NZ      | CR3/4    | humerus     | fossil       | 875                      | 1140                           |
| Eumi_a52    | CM Av17619F                   | Long Beach (Otago) | NZ      | CR3/4    | humerus     | fossil       | 784                      | 1230                           |
| Eumi_a60    | CM Av17619G                   | Long Beach (Otago) | NZ      | CR3/4    | tibiotarsus | fossil       | 835                      | 1180                           |
| Eumi_a59    | CM Av17619H                   | Long Beach (Otago) | NZ      | CR3/4    | tibiotarsus | fossil       | 784                      | 1230                           |
| Eumi_a99    | OM LB/D/C5/14                 | Long Beach (Otago) | NZ      | CR3&4    | coracoid    | early        | 1356                     | 658                            |
| Eumi_a100   | OM LB/D/4G/13                 | Long Beach (Otago) | NZ      | CR3&4    | humerus     | middle       | 1554                     | 461                            |
| Eumi_a101   | OM LB/D/2C/13                 | Long Beach (Otago) | NZ      | CR3&4    | femur       | early/middle | 1524                     | 492                            |

| Sample Name | Museum Accession             | Location                  | Lineage | Fragment | Element       | Deposit type | Mean cal age (yrs BC/AD) | Mean cal age (yrs BP, 2014 AD) |
|-------------|------------------------------|---------------------------|---------|----------|---------------|--------------|--------------------------|--------------------------------|
| Eumi_a61    | CM Av13740                   | Kaikai's Beach            | NZ      | CR3/4    | femur         | any          | -                        | -                              |
| Eumi_a118   | JH I44/344,114               | Harwood                   | NZ      | CR3/4    | humerus       | fossil       | 1184                     | 831                            |
| Eumi_a119   | JH I44/344,10                | Harwood                   | NZ      | CR3/4    | humerus       | fossil       | 1184                     | 831                            |
| Eumi_a25    | OUA S2E4                     | Sandfly Bay               | NZ      | CR3/4    | tibiotarsus   | early        | 1396                     | 618                            |
| Eumi_a49    | CM Av34414A                  | Cannibal Bay              | NZ      | CR3/4    | femur         | fossil/early | 1188                     | 826                            |
| Eumi_a65    | CM Av34414B                  | Cannibal Bay              | NZ      | CR3/4    | femur         | fossil/early | 1188                     | 826                            |
| Eumi_a64    | CM Av34414C                  | Cannibal Bay              | NZ      | CR3/4    | femur         | fossil/early | 1188                     | 826                            |
| Eumi_a62    | CM Av36176                   | Pounawea                  | -       | -        | tibiotarsus   | early        | -                        | -                              |
| Eumi_a63    | CM Av34057                   | Pounawea                  | NZ      | CR3/4    | femur         | early        | 1329                     | 686                            |
| Eumi_a20    | CM Av32874                   | Pounawea                  | -       | -        | femur         | early        | -                        | -                              |
| Eumi_a7     | CM Av34572                   | Papatowai                 | NZ      | CR3/4    | femur         | early        | 1343                     | 672                            |
| Eumi_a26    | OUA PPT5/BB3                 | Papatowai                 | NZ      | CR3/4    | humerus       | early        | 1343                     | 672                            |
| Eumi_a15    | Landcare Research Collection | Colac Bay                 | NZ      | CR3/4    | humerus       | fossil/early | -                        | -                              |
| Eumi_a16    | Landcare Research Collection | Colac Bay                 | NZ      | CR3/4    | humerus       | fossil/early | -                        | -                              |
| Eumi_a50    | CM Av27269                   | Cave, Big Solander Is     | NZ      | CR3/4    | tibiotarsus   | fossil       | -                        | -                              |
| Eumi_a1     | CM Av14837                   | Mason Bay, Stw Is         | NZ      | CR3/4    | femur         | fossil       | -                        | -                              |
| Eumi_a18    | CM Av26146                   | Mason Bay, Stw Is         | NZ      | CR3/4    | femur         | fossil       | -                        | -                              |
| Eumi_a10    | CM Av26156                   | Mason Bay, Stw Is         | NZ      | CR3/4    | femur         | fossil       | -                        | -                              |
| Eumi_a81    | NMNZ S.36151.1               | Mason Bay, Stw Is         | NZ      | CR3/4    | femur         | fossil       | -                        | -                              |
| Eumi_a120   | CM ONGPS37 unregistered      | Old Neck, Stw Is          | -       | -        | humerus       | fossil/early | -                        | -                              |
| Eumi_a121   | CM ONGSP41 unregistered      | Old Neck, Stw Is          | NZ      | CR3&4    | coracoid      | fossil/early | -                        | -                              |
| Eumi_a122   | CM ONGPS42 unregistered      | Old Neck, Stw Is          | NZ      | CR3&4    | coracoid      | fossil/early | -                        | -                              |
| Eumi_hi1    | NMNZ OR.015386               | Pilots Beach              | AUS     | CR3/4    | skin toe pad  | historic     | 1969                     | 45                             |
| Eumi_hi2    | NMNZ OR.015387               | Pilots Beach              | AUS     | CR3/4    | skin toe pad  | historic     | 1969                     | 45                             |
| Eumi_hi3    | NMNZ OR.015388               | Pilots Beach              | AUS     | CR3/4    | skin toe pad  | historic     | 1969                     | 45                             |
| Eumi_hi4    | NMNZ OR.015389               | Pilots Beach              | AUS     | CR3/4    | skin toe pad  | historic     | 1969                     | 45                             |
| Eumi_hi5    | NMNZ OR.015390               | Bobby's Head (Palmerston) | AUS     | CR3/4    | skin toe pad  | historic     | 1969                     | 45                             |
| Eumi_hi6    | NMNZ OR.015391               | Bobby's Head (Palmerston) | NZ      | CR3/4    | skin toe pad  | historic     | 1969                     | 45                             |
| Eumi_hi7    | NMNZ OR.7210b                | Cape Saunders             | NZ      | CR3&4    | egg shell     | historic     | 1906                     | 108                            |
| Eumi_hi8    | OM AV059                     | Otago/Dunedin             | NZ      | CR3      | skin feathers | historic     | 1905                     | 109                            |
| Eumi_hi9    | OM AV060                     | Otago/Dunedin             | AUS     | CR3&4    | skin feathers | historic     | before 1915              | 99                             |

**Table S2.** Proxy dates for Holocene fossil and archaeological sites containing *Eudiptula* remains. Radiocarbon dates were calibrated in OxCal v4.2 [13] using either the ShCal13 [14] or the Marine13 calibration curve [15] with a local  $\Delta R$  value of  $-41 \pm 39$  [16]. Median ages were calculated for each date (yrs BC/AD and yrs BP, present = AD 1950) and all median ages for one site were then averaged to obtain one mean calibrated age per site. Mean calibrated ages for a site were then standardised to AD 2014. Calibrated age ranges represent minimum and maximum calibrated age observed for a site. RCDB – New Zealand Radiocarbon Database.

| Location       | Layer               | Cal age range (yr BC/AD) | Mean cal age (yr BC/AD) | Mean cal age (yrs BP, AD 2014) | Material                                       | Source             |
|----------------|---------------------|--------------------------|-------------------------|--------------------------------|------------------------------------------------|--------------------|
| Cape Wanbrow   | natural             | 32661-31955 (BC)         | 32308 (BC)              | 34321                          | Marine bird                                    | this study         |
| Tai Rua        | L5-6                | 1406-1621                | 1514                    | 502                            | Marine shell                                   | [1]                |
| Shag River     | all layers          | 1270-1459                | 1383                    | 632                            | Charcoal, moa bone, Moa egg shell, marine bird | [2-3]              |
| Pleasant River | upper               | 1320-1660                | 1509                    | 507                            | Charcoal, marine shell                         | [4]                |
|                | lower               | 1291-1450                | 1359                    | 656                            | Charcoal                                       | [4]                |
| Huriawa        | upper & mid terrace | 320-947                  | 639                     | 1370                           | Marine bird                                    | this study         |
| Ross Rocks     | L3                  | 1450-1797                | 1595                    | 421                            | Marine shell                                   | [5]; RCDB          |
|                | L3b                 | 1273-1465                | 1369                    | 645                            | Marine shell                                   | [5]; RCDB          |
|                | L2                  | 1019-1482                | 1282                    | 751                            | Marine bird                                    | this study         |
| Omimi          |                     | 1312-1492                | 1402                    | 613                            | Fish bone                                      | [6]                |
| Warrington     | AreaB, L1/1a        | 1316-1522                | 1397                    | 617                            | Marine shell                                   | RCDB               |
|                | 5D, L2D2            | 1295-1440                | 1368                    | 647                            | Marine bird                                    | this study         |
|                | AreaB, L2/2b        | 1197-1421                | 1303                    | 711                            | Marine shell                                   | RCDB               |
| Doctors Pt.    |                     | 701-1034                 | 882                     | 1133                           | Marine bird                                    | [7]                |
| Purakaunui     | North L2, South L2a | 1272-1505                | 1393                    | 622                            | Marine shell                                   | [8-9]; RCDB        |
| Long Beach     | Natural             | 195-1246                 | 793                     | 1230                           | Marine bird                                    | this study; [3, 7] |
|                | LB/D/4G-L3          | 1426-1649                | 1539                    | 476                            | Marine bird                                    | this study         |
|                | OM U4C/14           | 1266-1440                | 1356                    | 658                            | Marine bird                                    | [3]                |
| Harwood        |                     | 831-1385                 | 1184                    | 831                            | Marine bird                                    | [3, 7]             |
| Sandfly Bay    | all areas           | 1288-1612                | 1396                    | 618                            | Charcoal                                       | [5]                |
| Cannibal Bay   | natural             | 915-1430                 | 1188                    | 826                            | Marine bird                                    | [7]                |
| Pounaweia      | upper               | 1311-1615                | 1431                    | 584                            | Marine shell                                   | [10]               |
|                | lower               | 1164-1450                | 1329                    | 686                            | Moa bone                                       | [10-11]; RCDB      |
| Papatowai      | all layers          | 1192-1476                | 1343                    | 672                            | Moa bone, charcoal, marine shell               | [5-12]; RCDB       |

**Table S3.** Parameter and 5% and 95% confidence estimates, and prior distributions for AUS and Combined models using long (Lo – 107bp) and short (Sh – 53bp) sequence fragments. Models were run at three different mutation rates, given in substitutions/site/million years (s/s/Myr), and using different summary statistics. Estimates of time are in units of generation time (8.75yr) before present (AD 2014). Anc – ancestral population, AUS – *E.novaehollandiae*, D – Tajima’s D, Inter-PairDiffs – pairwise inter-specific differences, H – Haplotype diversity,  $\overline{H_s}$  – mean inter-group diversity, Mdn – Median, MLE –Maximum Likelihood Estimate, Mod – modern population, N – effective population size, NZ – *E. minor*, p<sub>AUS</sub> – proportion of *E. novaehollandiae* in the total population, PairDiff – pairwise inter- and intra-specific differences, r – population growth rate, t<sub>invasion</sub> – time of *E.novaehollandiae* invasion in Otago, t<sub>split</sub> – time of most recent common ancestor of *E. minor* and *E.novaehollandiae*, t<sub>step</sub> – time of change in *E. novaehollandiae* population proportions, U - uniform.

| Model    | Summary statistic                    | Parameter                          | 0.53 (s/s/Myr)                     |       |       |       | 0.96 (s/s/Myr) |       |       |       | 0.96 (s/s/Myr) |       |       |            | Prior    |           |
|----------|--------------------------------------|------------------------------------|------------------------------------|-------|-------|-------|----------------|-------|-------|-------|----------------|-------|-------|------------|----------|-----------|
|          |                                      |                                    | MLE                                | Mdn   | 5%    | 95%   | MLE            | Mdn   | 5%    | 95%   | MLE            | Mdn   | 5%    | 95%        |          |           |
| AUS0     | PairDiffs                            | log <sub>10</sub> N                | 3.22                               | 3.17  | 2.50  | 3.68  | 3.01           | 2.94  | 2.31  | 3.46  | 2.80           | 2.78  | 2.21  | 3.29       | U(2,6)   |           |
|          | D+Inter-PairDiffs                    | log <sub>10</sub> N                | 3.22                               | 3.17  | 2.50  | 3.68  | 3.01           | 2.94  | 2.31  | 3.46  | 2.80           | 2.78  | 2.21  | 3.29       | U(2,6)   |           |
|          | H+Fst                                | log <sub>10</sub> N                | 3.24                               | 3.12  | 2.18  | 3.74  | 3.04           | 2.92  | 2.17  | 3.54  | 2.84           | 2.80  | 2.16  | 3.39       | U(2,6)   |           |
|          | D+Fst+Hs                             | log <sub>10</sub> N                | 3.47                               | 3.24  | 2.29  | 3.84  | 3.08           | 3.02  | 2.24  | 3.65  | 3.06           | 2.87  | 2.17  | 3.46       | U(2,6)   |           |
| AUS1     | PairDiffs                            | log <sub>10</sub> N <sub>mod</sub> | 3.45                               | 3.93  | 2.76  | 5.71  | 3.17           | 3.72  | 2.54  | 5.70  | 4.26           | 4.53  | 3.83  | 5.77       | U(2,6)   |           |
|          |                                      | log <sub>10</sub> (-r)             | -2.44                              | -2.74 | -4.61 | -1.89 | -2.14          | -2.46 | -4.58 | -1.60 | -3.33          | -3.72 | -4.81 | -3.07      | U(-5,0)  |           |
|          | D+Inter-PairDiffs                    | log <sub>10</sub> N <sub>mod</sub> | 3.45                               | 3.93  | 2.76  | 5.71  | 3.17           | 3.72  | 2.54  | 5.70  | 3.00           | 3.70  | 2.46  | 5.70       | U(2,6)   |           |
|          |                                      | log <sub>10</sub> (-r)             | -2.44                              | -2.74 | -4.61 | -1.89 | -2.14          | -2.46 | -4.58 | -1.60 | -1.96          | -2.22 | -4.52 | -1.44      | U(-5,0)  |           |
|          | H+Fst                                | log <sub>10</sub> N <sub>mod</sub> | 3.43                               | 3.55  | 2.37  | 5.50  | 3.16           | 3.31  | 2.28  | 5.47  | 2.89           | 3.24  | 2.26  | 5.49       | U(2,6)   |           |
|          |                                      | log <sub>10</sub> (-r)             | -2.38                              | -2.80 | -4.61 | -1.73 | -2.13          | -2.63 | -4.67 | -1.51 | -1.94          | -2.43 | -4.64 | -1.37      | U(-5,0)  |           |
| AUS2     | D+Fst+Hs                             | log <sub>10</sub> N <sub>mod</sub> | 3.47                               | 3.63  | 2.47  | 5.46  | 3.27           | 3.40  | 2.33  | 5.39  | 3.04           | 3.32  | 2.32  | 5.42       | U(2,6)   |           |
|          |                                      | log <sub>10</sub> (-r)             | -2.53                              | -2.93 | -4.67 | -1.82 | -2.23          | -2.71 | -4.66 | -1.56 | -2.01          | -2.49 | -4.64 | -1.40      | U(-5,0)  |           |
|          | PairDiffs                            | log <sub>10</sub> N <sub>mod</sub> | 3.15                               | 3.17  | 2.45  | 3.71  | 3.27           | 3.16  | 2.48  | 3.72  | 2.71           | 2.73  | 2.18  | 3.29       | U(2,6)   |           |
|          |                                      | log <sub>10</sub> N <sub>anc</sub> | 5.52                               | 4.09  | 2.34  | 5.75  | 3.88           | 4.00  | 2.30  | 5.74  | 5.49           | 4.09  | 2.30  | 5.75       | U(2,6)   |           |
|          |                                      | t <sub>invasion</sub>              | 38.72                              | 32.49 | 16.40 | 47.44 | 45.18          | 31.94 | 16.46 | 47.78 | 24.58          | 32.58 | 16.85 | 47.69      | U(14,50) |           |
|          | D+Inter-PairDiffs                    | log <sub>10</sub> N <sub>mod</sub> | 3.15                               | 3.17  | 2.45  | 3.71  | 2.96           | 2.92  | 2.29  | 3.46  | 2.71           | 2.73  | 2.18  | 3.29       | U(2,6)   |           |
| AUS2     |                                      | log <sub>10</sub> N <sub>anc</sub> | 5.52                               | 4.09  | 2.34  | 5.75  | 4.96           | 4.07  | 2.32  | 5.74  | 5.49           | 4.09  | 2.30  | 5.75       | U(2,6)   |           |
|          |                                      | t <sub>invasion</sub>              | 38.72                              | 32.49 | 16.40 | 47.44 | 36.68          | 32.51 | 16.58 | 47.65 | 24.58          | 32.58 | 16.85 | 47.69      | U(14,50) |           |
|          | H+Fst                                | log <sub>10</sub> N <sub>mod</sub> | 3.32                               | 3.26  | 2.34  | 5.10  | 2.97           | 3.04  | 2.23  | 4.96  | 2.92           | 2.88  | 2.18  | 5.01       | U(2,6)   |           |
|          |                                      | log <sub>10</sub> N <sub>anc</sub> | 2.27                               | 3.65  | 2.15  | 5.69  | 2.28           | 3.68  | 2.15  | 5.69  | 2.25           | 3.76  | 2.15  | 5.71       | U(2,6)   |           |
|          |                                      | t <sub>invasion</sub>              | 41.32                              | 33.83 | 16.65 | 47.84 | 45.68          | 33.14 | 16.60 | 47.89 | 45.54          | 33.50 | 16.92 | 47.86      | U(14,50) |           |
|          | D+Fst+Hs                             | log <sub>10</sub> N <sub>mod</sub> | 3.43                               | 3.31  | 2.40  | 4.52  | 3.12           | 3.08  | 2.26  | 4.51  | 2.97           | 2.92  | 2.22  | 4.40       | U(2,6)   |           |
| AUS2     |                                      | log <sub>10</sub> N <sub>anc</sub> | 2.33                               | 3.85  | 2.20  | 5.72  | 2.30           | 3.89  | 2.19  | 5.72  | 2.30           | 3.93  | 2.20  | 5.71       | U(2,6)   |           |
|          |                                      | t <sub>invasion</sub>              | 42.16                              | 33.13 | 16.37 | 47.65 | 37.38          | 33.07 | 16.68 | 47.88 | 45.96          | 33.53 | 16.83 | 47.95      | U(14,50) |           |
|          | Comb1 Lo                             | PairDiffs                          | log <sub>10</sub> N <sub>AUS</sub> | 3.70  | 3.44  | 2.22  | 4.27           | 3.52  | 3.16  | 2.17  | 3.96           | 3.65  | 3.85  | 2.25       | 5.71     | U(2,6)    |
|          |                                      |                                    | log <sub>10</sub> N <sub>NZ</sub>  | 3.36  | 3.53  | 2.25  | 5.53           | 2.99  | 3.36  | 2.22  | 5.52           | 3.25  | 3.90  | 2.25       | 5.73     | U(2,6)    |
|          |                                      |                                    | log <sub>10</sub> N <sub>anc</sub> | 2.50  | 3.49  | 2.19  | 5.69           | 2.54  | 3.53  | 2.20  | 5.64           | 2.40  | 3.99  | 2.25       | 5.75     | U(2,6)    |
|          |                                      |                                    | t <sub>invasion</sub>              | 23.56 | 43.18 | 16.45 | 166.73         | 32.74 | 43.58 | 16.84 | 167.24         | 35.68 | 99.71 | 22.64      | 187.50   | U(12,200) |
|          |                                      | p <sub>AUS</sub>                   | 0.90                               | 0.65  | 0.16  | 0.96  | 0.66           | 0.63  | 0.15  | 0.95  | 0.74           | 0.52  | 0.07  | 0.94       | U(0,1)   |           |
|          | log <sub>10</sub> t <sub>split</sub> | 3.96                               | 3.86                               | 2.70  | 4.23  | 3.70  | 3.64           | 2.60  | 4.11  | 3.87  | 3.74           | 2.51  | 4.89  | U(2.3,4.3) |          |           |
| Comb1 Lo | D+Inter-                             | log <sub>10</sub> N <sub>AUS</sub> | 3.70                               | 3.44  | 2.22  | 4.27  | 3.52           | 3.16  | 2.17  | 3.96  | 3.65           | 3.85  | 2.25  | 5.71       | U(2,6)   |           |



|       |           |                      |                    |       |       |       |       |       |       |       |       |       |       |       |            |        |
|-------|-----------|----------------------|--------------------|-------|-------|-------|-------|-------|-------|-------|-------|-------|-------|-------|------------|--------|
|       |           | $t_{invasion}$       | 38.27              | 32.51 | 14.97 | 76.38 | 41.65 | 33.27 | 15.26 | 82.79 | 43.39 | 33.41 | 15.15 | 83.44 | U(12,200)  |        |
|       |           | $p_{AUS}$            | 0.92               | 0.79  | 0.35  | 0.97  | 0.92  | 0.81  | 0.35  | 0.98  | 0.94  | 0.81  | 0.36  | 0.98  | U(0,1)     |        |
|       |           | $\log_{10}t_{split}$ | 4.80               | 4.38  | 3.04  | 4.97  | 4.56  | 4.27  | 2.93  | 4.96  | 4.83  | 4.26  | 2.93  | 4.96  | U(2.3,4.3) |        |
|       | D+Fst+Hs  | $\log_{10}N_{AUS}$   | 3.67               | 3.72  | 2.24  | 5.60  | 3.42  | 3.52  | 2.21  | 5.57  | 3.09  | 3.49  | 2.22  | 5.56  | U(2,6)     |        |
|       |           | $\log_{10}N_{NZ}$    | 3.57               | 3.60  | 2.37  | 5.40  | 3.22  | 3.49  | 2.35  | 5.37  | 3.07  | 3.35  | 2.28  | 5.25  | U(2,6)     |        |
|       |           | $\log_{10}N_{anc}$   | 2.25               | 3.24  | 2.11  | 5.65  | 2.28  | 3.37  | 2.12  | 5.70  | 2.22  | 3.36  | 2.11  | 5.67  | U(2,6)     |        |
|       |           | $t_{invasion}$       | 38.98              | 32.66 | 15.05 | 73.24 | 40.97 | 33.13 | 15.25 | 70.94 | 43.39 | 33.17 | 15.10 | 74.85 | U(12,200)  |        |
|       |           | $p_{AUS}$            | 0.93               | 0.80  | 0.36  | 0.98  | 0.93  | 0.82  | 0.38  | 0.98  | 0.94  | 0.82  | 0.38  | 0.98  | U(0,1)     |        |
|       |           | $\log_{10}t_{split}$ | 4.82               | 4.40  | 3.07  | 4.98  | 4.80  | 4.28  | 3.00  | 4.96  | 4.83  | 4.27  | 2.98  | 4.96  | U(2.3,4.3) |        |
| Comb2 | PairDiffs | $\log_{10}N_{AUS}$   | 3.63               | 3.27  | 2.17  | 4.20  | 3.36  | 2.99  | 2.13  | 3.85  | 3.14  | 2.87  | 2.12  | 3.71  | U(2,6)     |        |
| Sh    |           | $\log_{10}N_{NZ}$    | 3.34               | 3.33  | 2.23  | 4.78  | 3.31  | 3.13  | 2.20  | 4.35  | 3.00  | 3.01  | 2.16  | 4.28  | U(2,6)     |        |
|       |           | $\log_{10}N_{anc}$   | 2.50               | 3.96  | 2.25  | 5.75  | 2.59  | 3.94  | 2.26  | 5.74  | 2.73  | 3.98  | 2.26  | 5.75  | U(2,6)     |        |
|       |           | $t_{step}$           | 6.83               | 6.69  | 1.88  | 10.40 | 6.22  | 6.71  | 1.87  | 10.43 | 9.00  | 6.73  | 1.90  | 10.37 | U(12,200)  |        |
|       |           | $p1_{AUS}$           | 0.95               | 0.83  | 0.58  | 0.98  | 0.95  | 0.82  | 0.58  | 0.98  | 0.95  | 0.82  | 0.57  | 0.98  | U(0,1)     |        |
|       |           | $t_{invasion}$       | 32.45              | 35.44 | 15.22 | 61.13 | 22.25 | 33.71 | 14.94 | 59.99 | 25.20 | 34.61 | 14.98 | 61.27 | U(12,200)  |        |
|       |           | $p2_{AUS}$           | 0.39               | 0.48  | 0.07  | 0.92  | 0.50  | 0.48  | 0.07  | 0.92  | 0.40  | 0.48  | 0.07  | 0.92  | U(0,1)     |        |
|       |           | $\log_{10}t_{split}$ | 4.22               | 4.05  | 3.35  | 4.27  | 4.00  | 3.88  | 3.24  | 4.20  | 3.77  | 3.73  | 3.09  | 4.08  | U(2.3,4.3) |        |
|       |           | D+Inter-PairDiffs    | $\log_{10}N_{AUS}$ | 3.63  | 3.27  | 2.17  | 4.20  | 3.36  | 2.99  | 2.13  | 3.85  | 3.14  | 2.87  | 2.12  | 3.71       | U(2,6) |
|       |           |                      | $\log_{10}N_{NZ}$  | 3.34  | 3.33  | 2.23  | 4.78  | 3.31  | 3.13  | 2.20  | 4.35  | 3.00  | 3.01  | 2.16  | 4.28       | U(2,6) |
|       |           | $\log_{10}N_{anc}$   | 2.50               | 3.96  | 2.25  | 5.75  | 2.59  | 3.94  | 2.26  | 5.74  | 2.73  | 3.98  | 2.26  | 5.75  | U(2,6)     |        |
|       |           | $t_{step}$           | 6.83               | 6.69  | 1.88  | 10.40 | 6.22  | 6.71  | 1.87  | 10.43 | 9.00  | 6.73  | 1.90  | 10.37 | U(12,200)  |        |
|       |           | $p1_{AUS}$           | 0.95               | 0.83  | 0.58  | 0.98  | 0.95  | 0.82  | 0.58  | 0.98  | 0.95  | 0.82  | 0.57  | 0.98  | U(0,1)     |        |
|       |           | $t_{invasion}$       | 32.45              | 35.44 | 15.22 | 61.13 | 22.25 | 33.71 | 14.94 | 59.99 | 25.20 | 34.61 | 14.98 | 61.27 | U(12,200)  |        |
|       |           | $p2_{AUS}$           | 0.39               | 0.48  | 0.07  | 0.92  | 0.50  | 0.48  | 0.07  | 0.92  | 0.40  | 0.48  | 0.07  | 0.92  | U(0,1)     |        |
|       |           | $\log_{10}t_{split}$ | 4.22               | 4.05  | 3.35  | 4.27  | 4.00  | 3.88  | 3.24  | 4.20  | 3.77  | 3.73  | 3.09  | 4.08  | U(2.3,4.3) |        |
|       | H+Fst     | $\log_{10}N_{AUS}$   | 2.87               | 3.13  | 2.17  | 4.87  | 3.07  | 3.08  | 2.18  | 4.76  | 2.75  | 2.97  | 2.15  | 4.57  | U(2,6)     |        |
|       |           | $\log_{10}N_{NZ}$    | 3.28               | 3.38  | 2.38  | 5.13  | 3.14  | 3.22  | 2.31  | 4.71  | 3.23  | 3.17  | 2.30  | 4.55  | U(2,6)     |        |
|       |           | $\log_{10}N_{anc}$   | 2.39               | 3.72  | 2.18  | 5.72  | 2.35  | 3.67  | 2.17  | 5.68  | 2.25  | 3.68  | 2.16  | 5.71  | U(2,6)     |        |
|       |           | $t_{step}$           | 9.00               | 7.06  | 2.09  | 10.42 | 6.21  | 7.05  | 2.10  | 10.44 | 6.99  | 7.16  | 2.07  | 10.44 | U(12,200)  |        |
|       |           | $p1_{AUS}$           | 0.95               | 0.87  | 0.64  | 0.98  | 0.96  | 0.86  | 0.63  | 0.98  | 0.97  | 0.87  | 0.64  | 0.99  | U(0,1)     |        |
|       |           | $t_{invasion}$       | 35.17              | 33.26 | 14.94 | 56.56 | 21.68 | 32.32 | 14.68 | 58.00 | 27.24 | 32.42 | 14.78 | 56.56 | U(12,200)  |        |
|       |           | $p2_{AUS}$           | 0.58               | 0.50  | 0.07  | 0.91  | 0.53  | 0.47  | 0.06  | 0.91  | 0.59  | 0.49  | 0.06  | 0.92  | U(0,1)     |        |
|       |           | $\log_{10}t_{split}$ | 4.18               | 3.91  | 3.17  | 4.25  | 4.14  | 3.87  | 3.05  | 4.25  | 4.19  | 3.86  | 3.00  | 4.25  | U(2.3,4.3) |        |
|       | D+Fst+Hs  | $\log_{10}N_{AUS}$   | 2.99               | 3.27  | 2.20  | 5.15  | 2.75  | 3.18  | 2.20  | 4.99  | 2.83  | 3.05  | 2.17  | 4.83  | U(2,6)     |        |
|       |           | $\log_{10}N_{NZ}$    | 3.29               | 3.41  | 2.40  | 5.19  | 3.15  | 3.24  | 2.33  | 4.83  | 3.20  | 3.18  | 2.31  | 4.59  | U(2,6)     |        |
|       |           | $\log_{10}N_{anc}$   | 2.41               | 3.67  | 2.19  | 5.72  | 2.35  | 3.67  | 2.18  | 5.68  | 2.26  | 3.65  | 2.16  | 5.70  | U(2,6)     |        |
|       |           | $t_{step}$           | 9.00               | 7.09  | 2.07  | 10.44 | 6.21  | 7.06  | 2.14  | 10.45 | 8.00  | 7.13  | 2.06  | 10.45 | U(12,200)  |        |
|       |           | $p1_{AUS}$           | 0.96               | 0.88  | 0.65  | 0.98  | 0.96  | 0.87  | 0.64  | 0.99  | 0.97  | 0.88  | 0.65  | 0.99  | U(0,1)     |        |
|       |           | $t_{invasion}$       | 35.05              | 33.04 | 14.97 | 55.83 | 18.63 | 32.20 | 14.74 | 57.19 | 27.01 | 32.21 | 14.80 | 55.92 | U(12,200)  |        |
|       |           | $p2_{AUS}$           | 0.60               | 0.51  | 0.07  | 0.92  | 0.52  | 0.49  | 0.07  | 0.92  | 0.66  | 0.51  | 0.06  | 0.92  | U(0,1)     |        |
|       |           | $\log_{10}t_{split}$ | 4.20               | 3.93  | 3.25  | 4.26  | 4.13  | 3.88  | 3.10  | 4.25  | 4.19  | 3.87  | 3.05  | 4.25  | U(2.3,4.3) |        |

**Table S4.** Statistical support for the maximally credible version of the AUS and Combined models for different mutation rates given in substitutions/site/million years (s/s/Myr). Supported models are highlighted in grey. Lo – long sequence fragments (107 bp); Sh – short sequence fragments (53 bp).

| Model                       | Parameters | AICc | Weight   | Support | Beaumont |        |
|-----------------------------|------------|------|----------|---------|----------|--------|
| <b>AUS Models</b>           |            |      |          |         |          |        |
| 0.53 s/s/Myr                |            |      |          |         |          |        |
|                             | 0          | 1    | 6.0529   | 1.0000  | 0.9970   | 0.5690 |
|                             | 1          | 2    | 25.4008  | 0.0001  | 0.0001   | 0.4110 |
|                             | 2          | 3    | 17.6917  | 0.0030  | 0.0030   | 0.0200 |
| 0.96 s/s/Myr                |            |      |          |         |          |        |
|                             | 0          | 1    | 5.8721   | 1.0000  | 0.7650   | 0.5050 |
|                             | 1          | 2    | 28.5094  | 0.0000  | 0.0000   | 0.2610 |
|                             | 2          | 3    | 8.2329   | 0.3072  | 0.2350   | 0.2340 |
| 1.43 s/s/Myr                |            |      |          |         |          |        |
|                             | 0          | 1    | 55.9110  | 1.0000  | 1.0000   | 0.8930 |
|                             | 1          | 2    | 326.7821 | 0.0000  | 0.0000   | 0.0330 |
|                             | 2          | 3    | 133.1493 | 0.0000  | 0.0000   | 0.0740 |
| <b>Combined Models (Lo)</b> |            |      |          |         |          |        |
| 0.53 s/s/Myr                |            |      |          |         |          |        |
|                             | 1          | 5    | 30.1583  | 0.0045  | 0.0045   | 0.1610 |
|                             | 2          | 7    | 19.3423  | 1.0000  | 0.9955   | 0.8390 |
| 0.96 s/s/Myr                |            |      |          |         |          |        |
|                             | 1          | 5    | 23.0278  | 0.0150  | 0.0148   | 0.3570 |
|                             | 2          | 7    | 14.6344  | 1.0000  | 0.9852   | 0.6430 |
| 1.43 s/s/Myr                |            |      |          |         |          |        |
|                             | 1          | 5    | 21.3038  | 0.0179  | 0.0175   | 0.1310 |
|                             | 2          | 7    | 13.2526  | 1.0000  | 0.9825   | 0.8690 |
| <b>Combined Models (Sh)</b> |            |      |          |         |          |        |
| 0.53 s/s/Myr                |            |      |          |         |          |        |
|                             | 1          | 5    | 26.0710  | 0.0060  | 0.0060   | 0.1060 |
|                             | 2          | 7    | 15.8400  | 1.0000  | 0.9940   | 0.8940 |
| 0.96 s/s/Myr                |            |      |          |         |          |        |
|                             | 1          | 5    | 18.2819  | 1.0000  | 0.5289   | 0.0750 |
|                             | 2          | 7    | 18.5131  | 0.8908  | 0.4711   | 0.9250 |
| 1.43 s/s/Myr                |            |      |          |         |          |        |
|                             | 1          | 5    | 24.1061  | 0.0884  | 0.0812   | 0.0050 |
|                             | 2          | 7    | 19.2543  | 1.0000  | 0.9188   | 0.9950 |

## References

- [1] Trotter MM. 1967 Radiocarbon dates from north otago. *New Zealand Archaeological Association Newsletter* **10**, 6.

- [2] Anderson A, Smith IWG, Higham TFG. 1996 *Radiocarbon chronology*. Canberra, ANH Publications; pp. 60-69.
- [3] Rawlence NJ, Perry GLW, Smith IWG, Scofield RP, Tennyson AJD, Matisoo-Smith EA, Boessenkool S, Austin JJ, Waters JM. 2015 Radiocarbon-dating and ancient DNA reveal rapid replacement of extinct prehistoric penguins. *Quaternary Sci Rev* **112**, 59-65. (doi:http://dx.doi.org/10.1016/j.quascirev.2015.01.011)
- [4] Smith I. 1999 Settlement permanence and function at Pleasant River Mouth, East Otago, New Zealand. *NZ J Archaeol* **19**, 27-79.
- [5] Smith I. 2013 Pre-European Maori exploitation of marine resources in two new zealand case study areas: Species range and temporal change. *J Roy Soc NZ* **43**, 1-37. (doi:10.1080/03036758.2011.574709)
- [6] Petersen KGP. 2006 The place of Omimi in North Otago prehistory : A thesis submitted for the degree of Master of Arts, University of Otago, Dunedin, New Zealand.
- [7] Rawlence NJ, Kennedy M, Anderson CNK, Till CE, Smith I, Scofield RP, Tennyson AJD, Hamel J, Lalas C, Matisoo-Smith EA, et al. 2015 Geographically contrasting biodiversity reductions in a widespread New Zealand seabird. *Mol Ecol* **24**, 4605-4616.
- [8] Latham PSM. 2005 Investigating change over time in the prehistoric fish catch at Purakaunui : A thesis submitted in 2005 for the degree of Master of Arts of the University of Otago, Dunedin, New Zealand.
- [9] Anderson AJ. 1981 A fourteenth-century fishing camp at Purakanui Inlet, otago. *J Roy Soc NZ* **11**, 201-221. (doi:10.1080/03036758.1981.10421837)
- [10] McFadgen BG. 2007 *Hostile shores : Catastrophic events in prehistoric new zealand and their impact on māori coastal communities*. Auckland, N.Z., Auckland University Press.
- [11] Anderson A. 1991 The chronology of colonization in New Zealand. *Antiquity* **65**, 767-795. (doi:doi:10.1017/S0003598X00080510)
- [12] Anderson A, Smith I. 1992 The Papatowai site: New evidence and interpretations. *J Polyn Soc* **101**, 129-158. (doi:10.2307/20706442)
- [13] Bronk Ramsey CB. 2009 Bayesian analysis of radiocarbon dates. *Radiocarbon* **51**, 337-360.
- [14] Hogg A. 2013 Shcal13 southern hemisphere calibration, 0–50,000 cal yr BP. *Radiocarbon* **55**, 1-15. (doi:10.2458/azu\_js\_rc.55.16783)
- [15] Reimer PJ, Bard E, Bayliss A, Beck JW, Blackwell PG, Ramsey CB, Buck CE, Cheng H, Edwards RL, Friedrich M, et al. 2013 Intcal13 and Marine13 radiocarbon age calibration curves 0-50,000 years cal BP. *Radiocarbon* **55**, 1869-1887.
- [16] Petchey F, Anderson A, Hogg A, Zondervan A. 2008 The marine reservoir effect in the Southern Ocean: An evaluation of extant and new delta R values and their application to archaeological chronologies. *J Roy Soc NZ* **38**, 243-262.
